# Supplementary material
Source: Springer Nature journal article supplement (https://www.springermedizin.de/resource/supplementary/12904_2011_106_MOESM2_ESM.pdf/9517508)

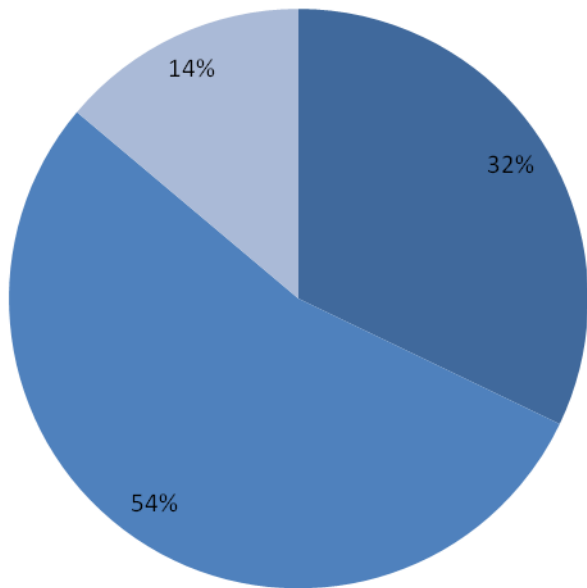

- HIV negative
- HIV positive
- HIV status unknown

Supplement: MOESM2 [file 9517508]
